# Supplementary material for: Indication of ongoing amphipod speciation in Lake Baikal by genetic structures within endemic species
Source: PubMed Central journal article supplement (PMC6613252; doi:10.1186/s12862-019-1470-8), 2019-07-08
Supplement: 12862_2019_1470_MOESM5_ESM.pdf [file 12862_2019_1470_MOESM5_ESM.pdf]

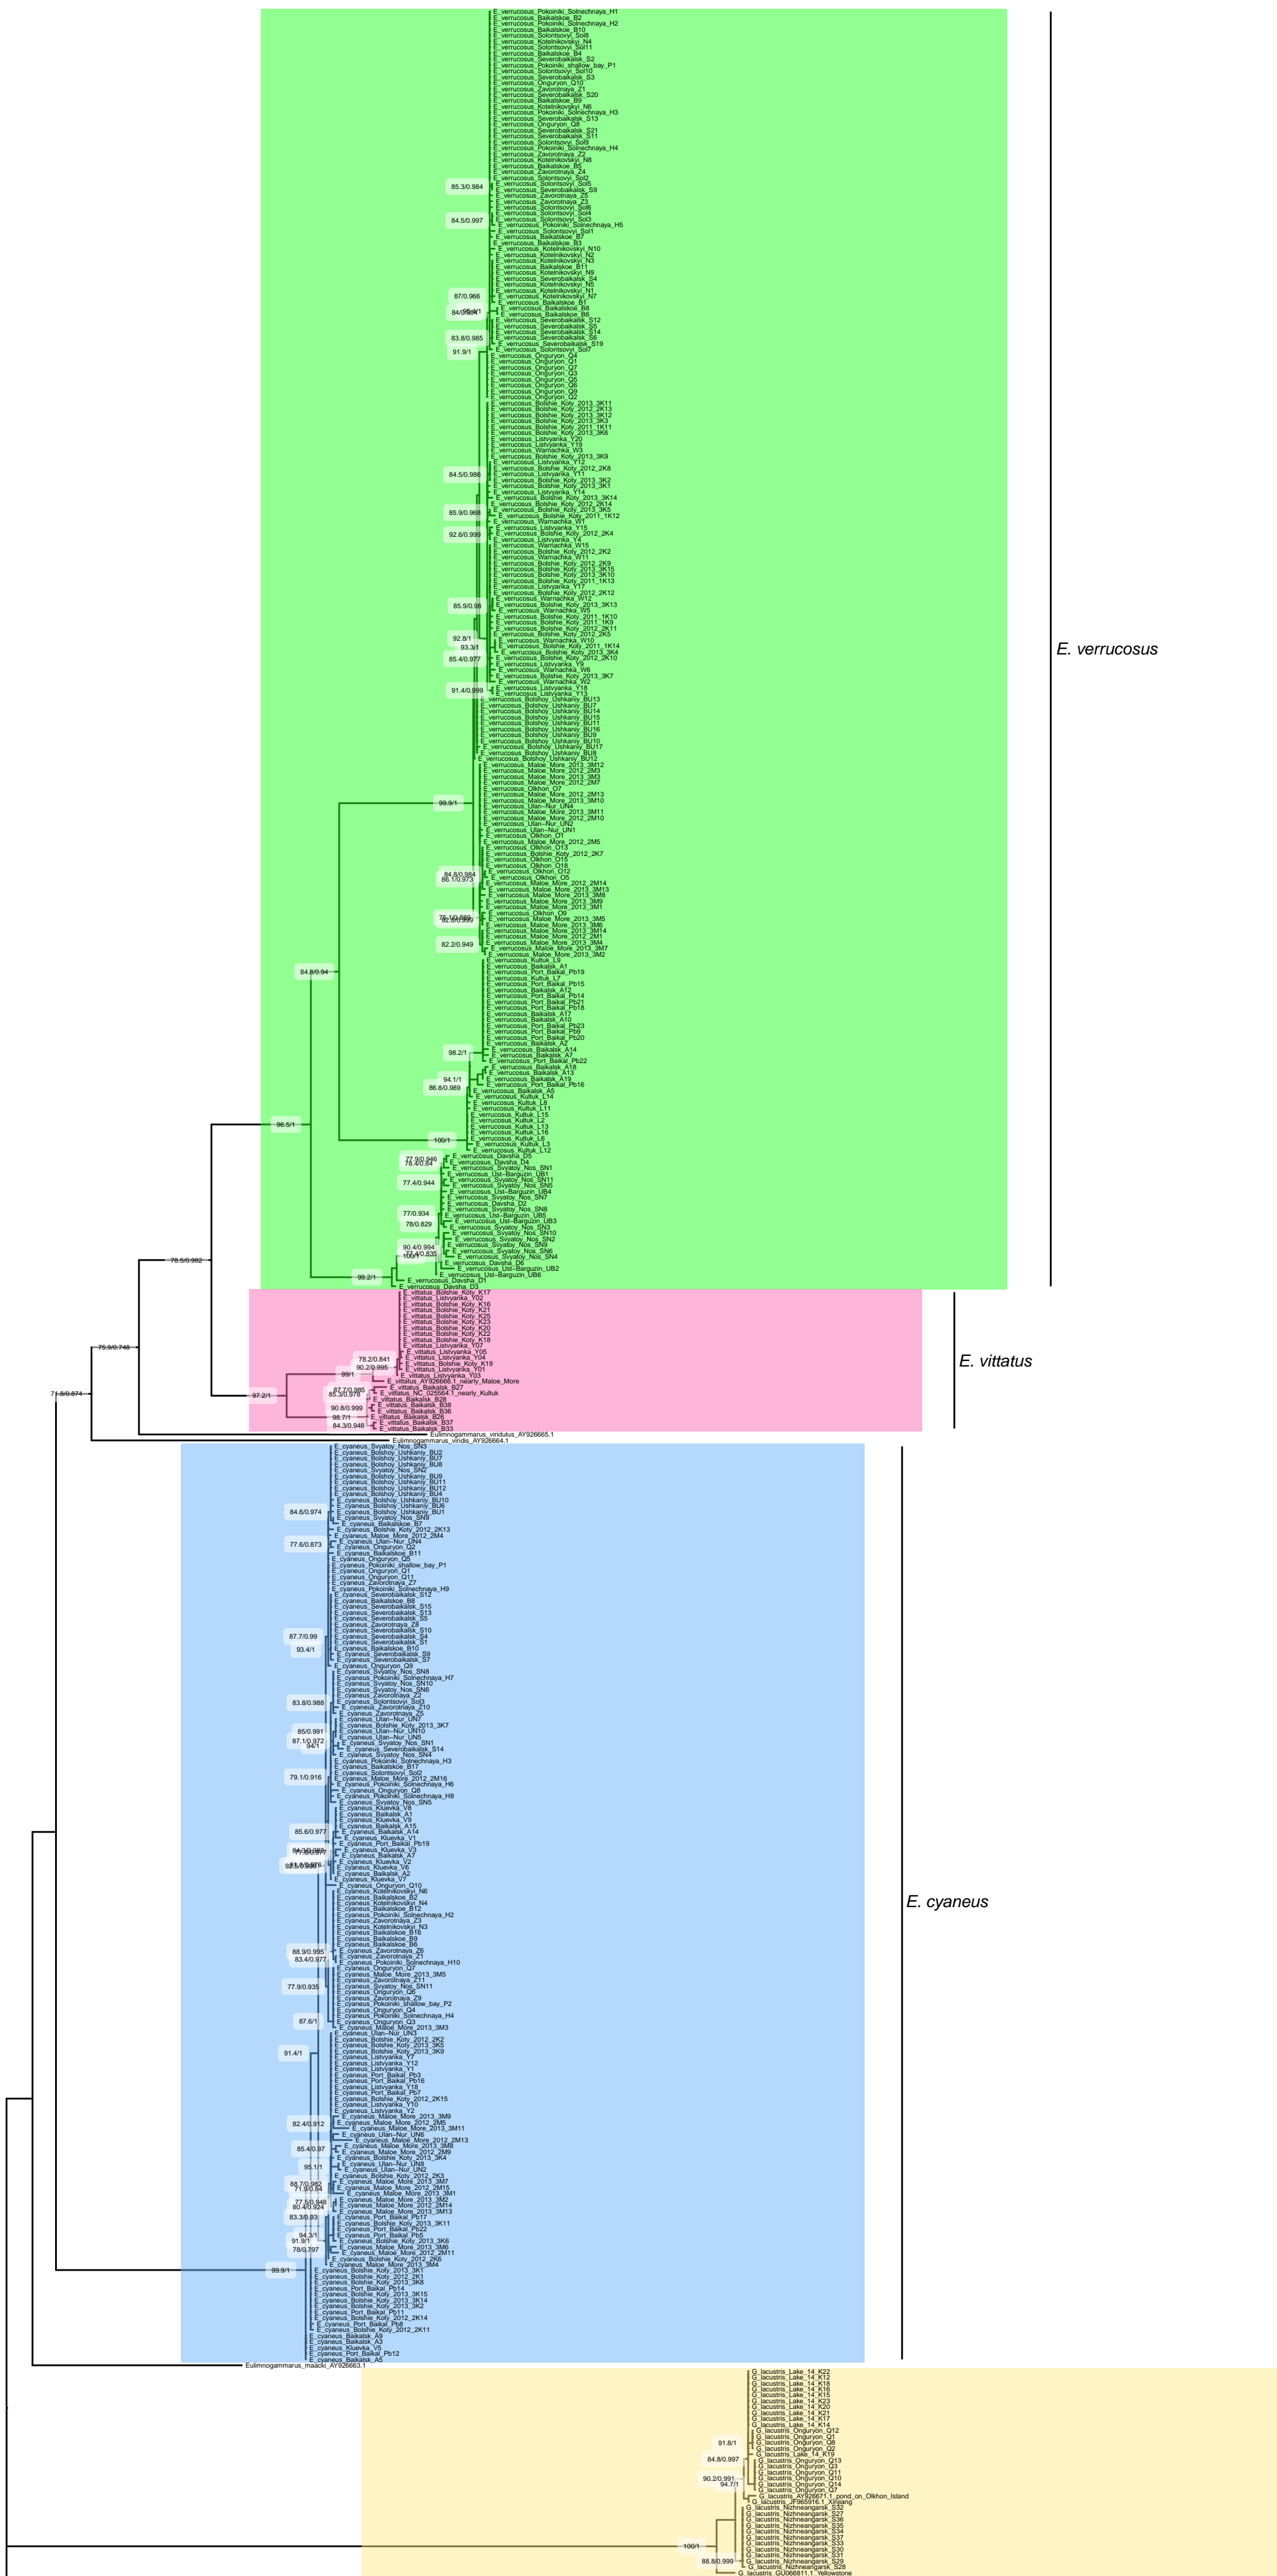

*E. verrucosus*

*E. vittatus*

*E. cyaneus*

*G. lacustris*
